# Supplementary material for: Comparing of Data Collection for Network Level Pavement Management of Urban Roads and Highways
Source: Hindawi journal article supplement (doi:10.1155/2020/9237963), 2020-01-06
Supplement: f1 [file 9237963.f1.xlsx]

## Sheet: Sheet1
ID	1	2	3	4	5	6	7	8	9	10	11	12	13	14	15	16	17	18	19	20	21	22	23	24	25	26	27	28	29	30
1033						0.762	0.838	0.787	0.759	1.085	1.122	1.139	1.353	0.763	0.812	0.866	0.825	2.005		0.959
1034					0.707	0.775	0.826	1.026	1.041	0.74	1.108	0.762	0.888	1.384	0.783	0.692	0.823	2.004		1.05	1.223			1.11
1035					0.713	0.769	0.826	0.8	0.758	1.069	0.744	2.788	0.747	0.703	0.778	0.705	1.94	1.999
1036					0.714		0.811	1.776	0.725	0.741	0.831	1.192	3.063	0.776	0.704	1.835	0.831	1.02		1.096	1.176	1.186
1037					0.711		0.843	0.95	0.721	0.752	1.073	2.784	0.729	0.765	0.799	0.7	0.802	1.017			1.112	1.119		1.236
1201							1.263	0.915	1.275	1.396	1.36	0.776	1.193	1.381	1.486	1.54	0.74	0.725	0.621	1.337		2.245	1.006		1.46	0.732	2.934	0.707	0.5	1.152
1202						0.909	0.852	1.376	1.001	1.204	1.19	1.379	0.866	0.732	0.697	2.042	0.663	0.704		0.735	2.055		2.458	0.668	1.456	0.466		0.557	0.492	1.14
1203						0.897	0.903	1.139	1.127	0.656	1.255	1.046	0.793	1.226	1.117	0.713	1.019	1.268	0.647	1.955	0.771	1.496	0.828	0.662	2.666	1.059	2.915	0.501		1.15
1204						0.87	0.873	1.065	0.597	1.186	0.966	1.04	0.803	1.242	0.789	1.585	1.166	1.061	0.894	0.749	2.115	2.312	1.036	0.855	2.678	1.057		0.529
1205							1.278	1.376	1.291	0.646	1.182	0.67	1.212	1.113	1.105	1.297	0.747	1.056	1.411	0.946	0.801	2.293	0.797	0.453	0.714	0.459	2.869	0.707		1.159
1207						0.939	0.907	1.097	2.288	0.973	1.054	1.042	1.499	0.787	1.636	1.581	0.656	1.034	0.699	1.404	1.455	0.639	1.034	1.039	0.479	2.812	2.912	1.073		1.153
1208							0.919	1.099	0.993	1.182	0.788	0.754	0.805	1.442	0.997	1.29	0.727	0.707	0.899	1.864	2.058	1.498	0.689	0.655	2.655	0.748		2.968	0.498
1209								1.379			0.808	1.228	0.811	1.057	1.286	0.707	0.661	1.061	0.646	1.901	1.442	1.009	1.013	2.579	0.46	0.733	2.894	1.068	0.497
1211							1.203	0.981	0.895	1.05	1.067	0.811	0.898	1.112	1.471	0.71	0.696	0.712	0.755	0.759		0.767	0.977	1.001		0.412	2.6	0.743
1215							0.804	1.098	0.668	1.093	0.926	1.249	1.136	1.122	1.187	0.88	1.055	1.358	1.001	0.766	2.008	1.071	1.426	0.777	1.772	0.427	2.581	2.556		1.188
1216						0.739	0.722	1.014	1.144	0.733	0.985	1.498	1.4	1.235	1.135	1.718	1.624	1.331	1.002	1.066	1.674	0.752	0.977	0.389	1.933	0.425	2.474	0.442		1.22
1217						0.71	0.727	1.306	0.719	0.782	0.779	0.838	0.89	1.078	1.159	1.479	0.883	1.321	0.725	1.048	0.748	0.778	1.342	0.816	0.411	2.525	2.508	0.745	0.433
1218							0.74	1.309				0.761	0.885	1.118	0.897	1.233	1.036	0.891	0.76	1.725	0.771	1.805	1.351	1.01	2.355	2.552		0.445	0.452
1219									0.751		0.939	0.756	0.892	1.138	0.848	1.245	0.786	0.888	0.714	0.767	2.018	1.225	2.262		0.878	0.906	2.548	1.167	0.453
1593					0.691			0.868	0.902	1.047	0.76	1.084	1.097	0.997	1.103	1.316	2.018	0.894		1.12	1.123	1.101	0.973	0.544	0.567	1.025		1.314		1.06
1596					0.686			1.086	0.872	0.69	1.079	0.783	1.077	1.032	0.668	1.107	0.682	1.102		2.851	0.931	0.994	0.97	1.008	1.217	0.567		0.623	0.662	1.052
1599								1.085		0.692			1.07	1.074	1.063	0.968	0.889	2.452			1.132	1.104	0.963	1.02	1.219
1604								0.745	0.629	0.627	2.079	0.656	0.645	0.643	0.658	1.222	2.315	2.336		2.342		2.494	1.284	1.797	1.166			1.894
1605								1.218	1.205	0.66	2.095	0.653	2.267	0.646	1.194	1.179	2.313	0.704		2.367	2.418			1.809	1.84	1.865		0.813
1606								1.216	0.62	0.624		0.644	2.257	1.218	1.196	0.688		0.727		2.351	2.48	2.484	1.353	1.788	1.183	1.869		0.821
1607								0.722	1.77	0.623	1.205	2.127	1.238	2.229		0.701	0.705		1.181	1.172	2.453	2.478	1.406	1.826	1.187			1.889
1608									0.63	0.63	1.192		1.203	1.099	0.662		0.679	0.702	1.178		2.437	2.546		1.877	1.848			0.808
1609								0.792		0.61	1.187		1.165	0.656			0.669	2.349		1.131	2.406		1.43		1.833			0.823
5011		1.038	1.134	1.309	1.737	1.335	1.254	1.429	1.974	1.341	1.931	2.058	1.69		1.769	1.833	2.514		2.31
5012					1.128	1.369	0.963	1.45	1.445	1.324	1.785	1.942	2.01	1.774	1.786	2.133	2.947		3.091
5013		1.068	1.669	1.303	1.365	0.871	1.246	1.439	1.516	1.32	1.579	1.537	1.748	2.1	1.775		2.402	2.665	3.13
5014			1.141	0.774	1.124	1.33	1.222	1.458	1.836	1.534	1.172	1.913	1.355	2.095	2.086	1.954	2.752	2.641
5015		1.088	1.116	0.777	0.8	1.339	0.92	1.465	1.446	1.306	1.208	1.891	1.424	2.108	1.747	1.906	2.314	2.591	2.941
5017		3.676		1.203	1.735	1.442	1.552		1.512	2.148	1.758	1.631	1.713	1.697	2.166	1.958	3.003	2.563	3.165
5018		1.594		1.748	0.829	1.484			1.586		1.539	1.606	1.497	1.713	1.741	1.948	2.407		2.334
5019				1.73	1.455	1.75			1.629		1.651	2.073	1.575	1.666	2.166	2.023
5022				0.896	1.48	1.405	1.146	0.545	1.284	1.143	1.263	1.306	1.256	1.347	1.389	1.402	4.311	1.44	1.576	1.595			1.764
5023		1.031	1.551	1.311	1.088	0.901	0.946	0.507	1.279	1.382	1.965	1.3	1.342	1.828	1.385	0.838	0.91	2.742		1.582	1.909	1.703	1.742					0.818
5024					1.091	0.899	0.941	0.519	1.091	1.137	1.705	2.287	1.266	0.68	1.408	2.735	1.343	2.593	3.362	1.611		1.7	1.739		1.772			0.803
5025		1.037	1.023	0.895	0.936	1.429	1.128	0.511	1.048	1.134	1.189	1.131	1.255	1.178	1.388	1.834	2.541		3.301	1.612		1.664			1.788
5026		1.402	1.065	1.067	0.959	1.109	1.142	1.054	1.245	1.082	1.401	1.369	1.431	1.317	2.021	2.744	1.329	1.434	1.532						1.776
5027		2.092	2.884	1.307		1.106	1.126		1.087	1.059	1.431	0.516	1.267	1.594	2.032	1.405	1.327	2.664	3.243		1.885	1.684	1.774		1.775			0.812
5028		1.048		1.083	1.072	1.091	1.159		2.514	1.064	1.217		1.304	1.873	2.082	2.773	2.669	1.507	1.57		1.933		1.794					0.811
5029				1.073	0.924						1.229	1.445	1.295	0.794	1.192	1.89	1.313	1.519	3.397		1.929	1.672			1.787			0.813
5031		2.142	1.653	1.056	0.975	1.756	0.764	0.532	1.191	0.813	0.55	0.543	0.541	1.091	1.05	1.113	0.826		1.671	1.145	1.233							0.656
5032		2.066	1.716	1.731	1.07	1.728	1.082	0.53	1.142	1.118	0.517	1.333	0.58	0.994	1.181	1.151	3.011		1.105		1.185		1.177		1.208			0.654
5035		1.383	1.078	0.795	0.95	1.135	1.176	0.543	1.202	1.01	0.795	0.866	0.983	1.086	1.063	1.539	1.12	2.963	1.119	1.163	1.22	1.18
5041		2.413	1.575	1.904	1.118	1.284	0.86	1.459	1.529	0.989	1.491	1.147	1.094		1.249	1.295	1.802		1.518									0.666
5042		1.263	0.803	1.888	1.035	1.361	0.811	0.477	2.101	1.606	0.479	1.473	0.554	0.78	0.738	1.217	1.835		1.133	1.157	1.551	1.198	1.163
5047		2.426	1.296		0.962	1.474	1.497		2.09	1.611	1.476	1.445	1.121	1.477	1.105	1.445	1.444	1.901	1.53		1.541		1.208					0.659
5049		2.4		1.159	1.454	1.09				1.534	1.086	0.539	1.051	1.739		1.286	1.851	1.884	1.524	1.146	1.516				1.21			0.644
5051		1.741	1.136	1.189	1.124	0.729	0.781	0.55	1.126	1.031	0.562	1.327	1.038		0.786	1.518	1.615		3.313	1.129	1.645		1.198					0.622
5053		1.702	1.422	1.753	0.709	1.697	0.739	0.575	1.262	1.308	0.862	1.975		1.435	0.751	1.868	1.938	1.609	3.28	1.125		1.182			1.213			0.631
5054		1.307	1.394	1.636	1.136	1.208	1.215	0.551	1.085	0.989	1.74	1.304	1.197	0.739	0.755	1.593	0.806	1.581	3.319	1.112		1.14	1.221		1.224			0.609
5055		1.341	1.315	1.793	1.184	1.707	1.205	1.31	1.074	1.295	1.248	0.548	1.197	1.416	1.479	1.008	0.874	2.544	1.079		1.633	1.141
5057		1.145	1.605	1.653	1.188		1.198		1.163		1.714	1.441	1.299	0.971	1.413	1.679	1.765	2.375	3.307		1.608		1.198					0.637
5058		1.136		1.188	0.667	1.21						0.555	1.174	1.363	1.5	1.487	0.846	2.601				1.139			1.201
5063		1.284	1.359	0.735	1.023	1.522	0.93	0.452	2.011	1.727	0.546	2.164	0.999	1.003	1.011	1.042	1.087			1.182	1.27	1.207	1.323
5065		1.058	1.825	0.961	0.81	0.869	1.063	0.848	1.053	1.721	2.141	1.107	1.119	1.091	1.127	1.045	1.565	1.446	3.143	1.196					1.419
5066		1.263	1.036	1.329	1.05	1.061	0.826	0.856	1.044	1.102	1.949	1.244	1.123	1.004	1.079	1.021	1.093	1.113	3.073		1.276	1.212	1.407					0.666
5067		1.496	1.056	1.437	1.051	1.053	0.829		0.877	1.737	1.146	1.224	1.124	1.057	1.014	0.744	1.844	1.344	3.102	1.213					1.42
5068				1.444	1.011	1.071	1.073				0.901	0.911	1.004	0.682	1.109	1.38	1.475	1.42	3.162		1.241	1.209	1.377		1.438			0.685
5075		1.264	1.408	2.423	0.767	1.254	0.989	0.975	1.066	1.001	1.128	1.061	0.526	0.917	0.733	0.956	0.988	1.529	1.672				1.095		1.136
5091		1.8	1.359	1.03	0.986	0.92	1.122	1.086	1.022	1.022	1.213		0.559		0.827	0.837	3.753				1.665				1.319
5092		1.009	0.908	1.036	0.966	0.947	1.884	0.518	1.521	1.2	0.933	2.585	0.558	0.815	0.858	2.825	1.41		5.282				1.213					0.591
5093		2.636	1.004	1.103	0.932	1.122	1.12	0.518	1.586	1.028	1.662	0.543	0.933	0.98	1.009	0.811	1.393	2.815	1.123	1.171		1.292						0.584
5095		2.636	1.966	1.044	1.01	1.154	0.934	1.095	0.989	1.226	1.009	1.474	1.373	1.263	1.264	3.134	1.397	1.468	5.26	1.126	1.691	1.249			1.45			0.602
5096		1.777	0.988		1.064	1.102	1.192	1.084	1.361	1.232	0.943	1.282	1.128	1.248	1.777	1.329	0.931	2.644	5.265		1.644	1.233	1.372		1.437
5098		2.732		1.12	0.925	1.133	1.187				1.213	1.241	1.134	1.231	1.913	1.022	1.324	1.425	5.272	1.09	1.653	1.251	1.363					0.594
5099		2.808		1.106	0.931	1.147			1.571		0.946	0.55	1.131	0.758	1.802	1.331	0.93						1.447		1.464
5592		2.772	1.335	0.974	0.988	1.308	1.08		1.376	1.411	1.337	1.527	0.995	1.558	0.92	1.132	1.666	1.598	1.373
5593		2.764	1.27	0.967	0.903	1.314	1.291	1.213	1.302	1.465	0.826	0.902			0.945	1.077	1.059	1.576	1.179		1.828
5613		1.892	1.113	0.805	0.993			0.478	1.331	0.819	0.642	1.364	1.678		0.813	0.987	0.96		2.213
5614		1.839	1.149		0.803		1.185	0.489	1.315		0.812	0.819	0.565	2.052	0.863	0.903	1.006	0.881	2.297
5615		1.832	1.089		1.035		1.188	0.78	0.793	0.815	0.601	0.528		0.675	1.72	0.844	0.878	0.877	2.389
5616			2.15		1.026		1.194		0.791	1.276	0.784	0.836	1.651	0.78	1.522	2.605	3.19	0.872
5618				0.813					1.26		0.793	0.815	1.678	0.788	1.753	0.927	0.863		2.292		0.867
5632		1.337	1.574		1.062	0.875	0.96	0.832	0.879	0.857	1.079	1.226	1.229	0.857	0.857	1.001	0.931		1.828
5633		1.309	1.528		0.879	0.862		0.844	0.856	1.069	0.779	1.153	0.689	0.88	0.877	1.056	0.958		1.881		0.995
5651		2.468	2.125		0.881		0.923	0.488			0.551	1.786			0.818	0.848	3.472
5652		2.144	2.193		0.873		0.968	0.502		1.312	1.652	0.546	0.603	0.791	2.275	2.866	3.478		4.078
5653		2.489	2.147		0.905			0.46		1.353		1.784	2.214	2.119	0.828	0.94	0.96		4.137
5654			2.177		0.792		0.927	0.498	1.266	1.41	0.577	0.537	0.609	0.812	0.785	0.882	0.973		4.084
5655		2.208	2.247		0.877		0.913	0.5	1.193	1.461	1.719	1.795	0.617	2.142	2.257				3.988
5656		2.11			0.799		0.934		1.263			1.863	2.167		0.78		0.941
5657					0.807				1.288	1.471	1.658	0.547	2.156	2.104	2.111		3.454
5658									1.222		0.578		0.62	2.186	2.267	2.753	3.481		4.064
5659											0.531		0.618	2.114	2.225	2.707
5663		1.716			1.033			0.608		1.192	0.713	0.763	0.778	1.199		1.361	1.252		1.398
5674		2.815			0.598		0.736		0.777	0.87		0.883	0.899	0.877	0.864	0.964	1.137		1.382
5686					0.896		0.978		1.195		1.123		1.174			1.184
5687		2.909			0.848					1.116	1.137	1.18	1.182	1.164
5691				1.128			1.149				2.043	2.252		1.19		1.364	1.628		2.281
5692				1.142	0.901		1.162			1.631		2.204			1.265	1.406	1.446
5693				1.158	0.927		1.136		1.577	1.659			1.083		1.246	1.516	1.685		2.228
5694				1.118	0.896		1.13		1.578	1.653	2.038			1.174			1.758
5695				1.133	0.897		1.146		1.549	1.686	2.044	2.246	1.096			1.372			2.223
5696					0.901				1.515		2.023	2.272	1.075	1.163			1.439
5697									1.552	1.711	2.037	2.248	1.091	1.191	1.239				2.229
5701							0.959			1.411	1.868	2.159				1.409			1.987
5702				1.19	0.794		0.97					2.123				1.362	1.52		2.056
5703				1.27	0.814		1.003			1.56		2.14	1.119		1.323	1.403	1.55		1.959
5705				1.216	0.804		0.984		1.408	1.56	1.905	2.141	1.103	1.196		1.384			2.06
5707									1.389			2.102		1.193	1.336		1.56
6012				2.539	2.557	2.832			3.229	3.355	3.139	3.18		3.714						0.992						0.81		0.876
6024					1.026	1.099			1.547	1.625	1.77	1.767	2.045	2.134		0.948				1.135						0.756		0.84
6031		1.76	0.88	0.917	1.04	0.987	1.007	1.931		0.986	2.184	1.153	3.2		1.309	1.483	1.9						2.168			0.469
6032		2.665			0.968	1.069	0.95	2.069	0.7	1.249	1.574	2.543	1.187	0.83	1.801	2.836	1.935			2.146			2.188		0.428	0.465		0.479
6033		2.723	0.886			1.081	0.955	1.128	0.687	1.013	1.51	2.558	1.583	1.765	1.93	0.868	1.911				2.18				0.431	0.48		0.465
6034		2.75	0.912		0.965	1.094	1.064	1.088	1.302	1.02	1.027	1.147	1.575	2.517	0.791	2.673	1.938			2.186								0.463
6035		2.579	2.738	0.909	0.855	1.055	0.915		0.715	0.972	1.482	2.614	3.361	2.511	1.672	0.867	1.384			2.2	2.199		2.2			0.492
6037			0.857	0.902	0.884			1.117		1.241	2.225	1.343		1.814		1.654	1.393				2.182		2.149		0.434	0.476
6038					0.863		1.002	1.931			0.741	2.89	3.466	1.299	0.82	1.867	1.365			2.21	2.159				0.429			0.46
6039							1.009		1.354		0.75	2.884	0.792	2.585		1.801	1.381
6043		1.753	3.225	0.888	0.914	0.89	1.132	1.199	0.99	1.426	1.481	1.392	1.599	1.655	1.995	3.129	1.883						2.016			0.534		0.509
6045		1.816	0.836	1.044	0.936	1.342	1.118	1.184	0.634	1.364	0.824	1.41	1.617	2.053	1.169	1.521	1.541			1.997	1.932					0.538		0.512
6048					0.771	1.338	0.866		1.02		0.83	1.512	1.606	1.216	1.78	1.559	1.483			1.99	1.922		2.031		0.499
6049					0.834	0.9	0.869		1.026		0.841	1.515	1.097	1.106	1.436	1.699	1.79				1.946		2.01					0.506
6054					0.917	1.038			1.209	1.163	1.296	1.483	1.609	1.945		0.842				0.98	0.978							0.656
6061		0.958	0.995	0.961	1.056	1.057	1	1.509	0.73	1.045	2.369	1.254	1.386	2.022	2.484	0.927	2.042									0.497		0.495
6062		2.01			1.029	1.055	1.007		1.124	1.113	1.154	1.591	1.239	2.131	1.273	1.574				1.677						0.481
6065		0.927	0.965		0.947	1.164	0.986	1.423	1.245	1.59	0.758	1.23	1.2	1.36	1.456	1.427	1.465				1.628				0.476	0.483
6066		1.711	2.549		1.083	1.148	1.056	1.433	0.786	1.627	1.171	2.129	1.366	1.172		0.924	2.043			1.7	1.655		1.604					0.492
6067			0.99	0.999	0.948	1.045		1.536	0.741	1.771	2.419	1.683	1.816	2.315	1.309	1.436	2.04				1.715		1.606		0.499	0.515		0.507
6068					1.062		1.053	2.547	0.799		0.762	1.77	0.838	2.002	2.33	1.415	1.464			1.693	1.669		1.575		0.498
6069					1.059	1.019	1.072	2.508	1.166		0.762	1.773		2.182	1.29		1.463			1.694	1.667							0.489
6071			0.774		1.015	1.262	0.86	1.091	0.672	1.282	1.542	1.189	1.563	2.22	2.196	1.754										0.569
6072					1.022	1.282	1.013	1.614	0.667	1.02	1.035	1.191	1.093	1.796	1.66	1.878					3.037		4.255			0.569		0.542
6074			0.791		1.045	0.838	1	1.679	1.259	1.22	1.543	1.21	1.525	3.067	1.079	2.862	1.724			2.704	2.933		4.196		0.567	0.568
6075			0.827	0.962	1.002	0.848	0.866	1.684	1.309	1.009	1.335	1.211	1.064	1.744	1.142	2.839	1.749			2.58			4.236		0.567			0.532
6077			2.57	0.932	0.893	1.09	0.86		1.02	1.461	1.555	2.042	2.377	1.096	2.117	1.369	1.556			2.633	3.223					0.574
6078				0.939			0.856		1.038			1.554	1.548	2.96	2.233	1.194	1.673						4.221					0.547
6079					0.979	0.863			0.978			1.582	1.483	2.196	2.164	1.439	1.532			2.728	3.048		4.186		0.567			0.536
6081			0.919	0.938	1.007	0.883	0.96	0.886		0.985	0.983	1.404	0.797	0.782	1.398	1.663	1.625				1.576		1.701		0.464
6083			0.925		0.82	0.933	0.965	0.89	1.142	0.971	1.101	1.06	1.034	1.312	0.797	0.807	1.689									0.456		0.492
6085			0.877		0.889	0.866	0.941	3.071	1.133	0.979	1.006	1.446	1.528	1.682	1.065	1.617	1.133				1.58		1.699		0.466	0.47
6088					0.984	0.962	0.957		0.985		0.793	1.07	0.781	1.859	0.787	1.139	1.13			1.565			1.736					0.479
6591			1.081				1.13	0.797		1.1	0.927	1.285	2.095	1.083		1.422	1.354
6592					0.71	1.081	1.112		1.142	1.572	1.599	1.285	2.094	1.094	1.118	1.569	1.563
6594			1.014		1.109	1.063	1.13	0.794		1.105	1.176	0.849	2.059	2.766	1.063
6595			1.067		0.708	1.059	1.106	0.809	1.101	1.575	1.176	0.861	2.031	1.13	1.118
6598					0.702	1.106						1.718		2.759	1.338		1.529
6599					1.128	1.058	1.097		1.116					2.685	1.354	1.624
6601		1.107	1.022		0.87	0.906	1.136			1.136	1.858	1.224	1.157	2.233	1.317	1.34	2.562						2.065			0.618		0.64
6605		1.092	1.004		1.146	1.16	1.513	1.046	1.714	1.133	1.658	1.004	1.198	1.231	1.314	2.527	1.551			1.722	1.842		2.06		0.634	0.635
6606			1.015		0.894	1.165	1.503	1.086	1.022	1.866	1.049	1.705	1.193	2.177	1.331	1.295				1.685	1.871		2.066		0.637			0.665
6607			1.008		1.145		1.504	1.17	1.682	1.507	1.727	1.896	2.055	1.192	1.778	1.421	1.453			1.709	1.872					0.638
6608					1.147	1.165			1.684			1.895	2.071	2.157	1.26	1.316	1.574
6609					1.15	1.157			1.674			1.891		1.189		1.303	1.443				1.85		2.092		0.629			0.641
6612					1.024	1.051	1.046	0.937	0.734	1.011	1.056	1.135	1.389	1.384	1.608	1.324	1.457									0.452		0.476
6618					0.843	1.068	0.871		0.853		0.767	1.25		1.429	1.194	1.306	2.384			1.605	1.668		1.685		0.468
6621		0.851	0.76		0.855	1.08	0.977	3.955	0.764	1.252	4.308	2.407	0.776	0.98		4.292					2.45		3.027			0.686		0.898
6622		1.982			1.015	0.889	1.043	3.884	0.745	1.263	4.24	1.248	1.283	1.977	1.61	4.242				2.117	2.623					0.732		0.86
6623		2.275	3.12		1.045	1.163	1.124	3.857	1.269	2.039	1.199	1.239	1.283	1.557	4.282	1.264	1.267						3.029		0.614	0.735		0.913
6624		2.339	0.777		1.053	1.091	1.169	3.868	1.174	1.233	4.315	2.374	2.771	1.531	4.181	4.199	1.196			2.365						0.687
6625		0.839	0.763		0.823	0.903	1.17		1.27	1.302	1.961	2.08	1.284	1.185	1.234	1.291	3.937			2.234					0.61	0.693
6628						1.075			1.187		0.792	2.452	0.794	1.93	4.123	1.717	1.317			2.093	2.209		2.964		0.617			0.884
6629					3.963		0.983		1.2		0.764	2.379	0.789	4.183		1.228	1.214				2.582		3.024
6642		1.147	0.688	1.091	0.77	0.769	1.152			1.082	1.127	1.224	1.154	2.032	1.243	2.711	2.381
6643		1.158	0.679	0.714		0.77	1.144			1.11	0.768	1.231	1.194	0.767	2.251	1.51	2.389
6644		1.426	0.699	1.075	0.902		1.135	1.145	0.76	1.084	2.142	1.908	1.184	0.777	1.289	1.498	1.456
6646			0.682	0.696	0.762	1.18	0.741	1.146	0.736	1.109	2.111	0.762	1.184	0.747	1.264	2.729
6647				0.72	0.921			1.122		0.753	0.777	0.757	0.768	0.774	1.212	1.505	2.505
6648					0.917		0.73		0.747			1.892		0.774	2.093		2.443
6649					0.947	0.726			0.758					0.747	2.253		1.51
6661		2.25	0.628		0.652		0.916			0.857		0.957	0.745	0.738
6664		2.311	0.621	0.638	0.678	1.249	0.912			0.695	0.87	0.753	0.905	0.747	0.927
6715		2.296		1.065		1.391	1.176			1.198	1.227	1.39	1.298	1.229		1.523
9012					0.846	0.824	0.897	0.784	1.322	1.157	1	0.86	0.864	1.181	1.222	1.26	1.005	0.998	0.994		1.033	1.499		1.283	3.289	0.831	1.055	1.893
9013					0.824	0.743	1.102	0.78	1.112	1.135	0.817	0.813	1.302	0.875	0.874	1.254	1.041	0.979	0.984	1.152	1.002	1.313	1.282	1.281	3.296	0.615	1.785
9014					1.11	0.725	0.887	1.126	1.118	0.792	0.827	1.29	1.293	1.08	0.856	0.988	1.663	0.977	1.299	1.482	1.267	1.318	2.716	1.282	3.29	0.837	0.888	0.873
9015					0.801	0.828	1.079	0.771	1.821	0.769	0.801	0.807	0.812	1.19	0.886	1.11	1.609		1.743	1.622	1.252	1.299	2.775	0.87	3.279	0.592	1.81	0.846
9016					1.103		1.088	0.972	0.782	1.076	0.806	0.852	1.26	1.233	1.236	0.973	1.624		1.712	1.145	1.252	1.511	2.87	1.023	3.246	0.838	1.029	0.844
9018					1.078		0.881	0.998		1.195	1.153	1.287	1.12	1.262	0.881	1.239	0.893	1.018	0.961	1.118	1.275	0.99	2.835					1.947
9021						0.896		1.182	1.008	1.084	0.854	1.132	0.912	1.231	1.18	1	1.438	0.814	1.177	1.43	1.001	0.98		1.024	1.323	1.133	1.241
9023					0.885	0.662	0.916	0.789	1.029	1.218	0.963	0.838	0.914	0.979	1.175	0.897	0.822	0.885	0.988	1.257	1.025	1.015	0.971	0.989		0.572	0.985	1.397
9025					1.092	0.889	0.737	0.922	1.06	1.198	0.816	0.8	1.198	0.9	0.887	0.878	0.827		0.991	0.847	0.907	0.974	1.15	1.192		1.144	0.979	1.4
9031						0.623		0.733	1.545	1.037	1.347	1.233	1.027	0.86	1.095	1.035		0.95		1.358		1.491		1.45	2.074	1.419	1.215
9033						0.973	1.308	0.734	1.231	0.883	1.05	0.91	1.424	1.294	1.376	1.031	0.884		1.616	1.355	1.025	1.148	1.642	1.43	2.449	1.405	1.178	0.745
9034					1.172	0.708	0.704	1.307	1.236	0.868	0.823	1.246	1.015	1.325	0.836	1.034	1.722	0.947	1.076	1.069	1.013	1.104	1.54	1.315	2.427	0.767	1.343	1.216
9035					0.927	0.969	0.713	0.688	0.797	0.881	1.058	1.248	0.955	1.015	1.087	1.01	1.729		1.079	1.078	1.013	1.202	1.216	0.752	2.316	1.143	1.193	0.729
9036					1.176	0.986	0.708	0.699	1.898	0.814	1.326	0.777	1.363	1.317	1.066	1.085	1.682	0.941	1.32	1.289	1.022	1.44	1.237	0.743	2.287	1.105	0.698	0.747
9038					0.934		0.7			1.013	1.348		1.353	1.353	1.346	1.374	0.9	0.949	1.03	1.048	1.145	2.207	1.214	0.733		1.145		1.148
9072							0.999		1.317	1.542	1.489	1.593	1.889	1.675			2.077		2.025						2.641	0.522
9073					0.946	0.95	1.011		1.317	1.529	1.504	1.554	1.831	1.694					2.024			2.197	2.373		2.55	0.515
9074						0.944	1.007		1.313	1.559	1.486	1.484	1.814	1.661					2.045			2.228	2.354			0.515
9075					0.945	0.939			1.314	1.549	1.522	1.506	1.898	1.682			2.053		2.11			2.274	2.247		2.572
9076					0.936	0.95	0.976						1.9	1.73			2.047					2.287	2.318		2.633
9077					0.94		1.01										2.116		2.1				2.325		2.559	0.5
9092					1.214	1.188			1.363	1.354	1.325	1.387	1.449	1.399			1.648		1.605
9093						1.19			1.382	1.362	1.329	1.389	1.444	1.396					1.619				1.834
9094						1.2			1.374	1.364	1.364	1.411	1.442	1.433					1.694			1.996	1.977
9095					1.197	1.188			1.347	1.358	1.369	1.407	1.441	1.419					1.658			1.863
9096					1.209				1.379				1.444	1.353			1.691					2.023	1.926
10031		2.235	2.093		2.346	2.445			3.145
10234		0.773	0.858	0.777		0.802		0.744			0.831			0.852		0.873	2.02
10338				2.933										1.626	1.784				1.905		2.163
10694		1.326	1.489		1.42	1.489			2.178				1.652	1.955
10701		1.014	1.07		1.176	1.013			1.58				1.686	2.001
16467		1.857	1.719						1.711		1.769						2.002
16471	1.241	1.412		1.565	1.605	1.522			1.889		1.883		2.04		1.986		2.35
16472	1.22	1.389	1.498		1.578	1.526			1.885	1.807	1.891						2.216
16473	1.256	1.388	1.516	1.544	1.539	1.618	1.648		1.839	1.824			2.035		1.986		2.296
16474	1.264	1.399	1.498	1.533	1.595	1.554	1.624		1.886	1.834					2.025		2.261
16475	1.248	1.409	1.498	1.547	1.592	1.522	1.63		1.871	1.803	1.95		2.028		1.863		2.153
16476			1.484	1.539			1.582				1.872		2.053		1.97
18021	1.463	1.572	1.502	1.195	1.238	1.723	1.979	1.784	1.837	2.311	2.266		3.932
18022		0.887	1.025	1.35	1.257	1.569	2.198	2.129	2.079	1.632	2.315		4.059
18023	1.481	0.902	0.996	1.146	1.247	1.586	1.649	2.124	1.931	1.633	3.12		4.121				4.084
18024	1.486	0.89	1.012	1.129	1.465	1.568	1.676	1.696	1.982	1.596	2.337		4.022		2.848
18025	1.539	0.891	1.021	1.357	1.439	1.629	1.679	1.759	1.945	2.274	2.285		2.673		2.851
18026	1.518	0.906		1.161			2.178	1.709	1.997	1.876	2.313		2.785		2.997		4.49
18027			1.489	1.138	1.265			2.001	2.001	2.274	2.954		2.78		2.878		4.347
18028		1.58	1.454		1.25		2.009	1.991			2.958				3.106		4.345
18029		1.595	1.455	1.169		1.738	2.039	1.821					2.738				4.199
20092	1.534		1.687	1.748			2.284			3.274
20094	1.532		1.733			1.943	2.287			3.812
20111	1.114	1.08	1.159		1.326	1.152	1.169		1.288		1.532				2.188
20112	1.121	1.108	1.164	1.172	1.306	1.169	1.174		1.246		1.505		1.788		2.212
20113	1.076	1.075		1.187	1.269	1.155	1.146		1.28								3.053
20114	1.101	1.102	1.174	1.201		1.146	1.156		1.298						2.243	2.54	3.461
20115		1.12		1.129		1.151	1.184		1.291				1.729			2.403	3.105
20116	1.127			1.139							1.525		1.76				3.148
20117			1.152		1.258						1.509				2.097	2.474
20118			1.142		1.308						1.558		1.782			2.547
20151	1.637	1.734	1.842	1.91		1.917		2.139	2.152	2.256	2.323		2.365
20152	1.726	1.752	1.802			1.909		2.147	2.138	2.283	2.291		2.36	2.367	2.423
20153		1.772	1.839	1.917	1.801	1.87		2.112	2.158	2.281	2.283		2.364						1.643
20154	1.643	1.686	1.811	1.892	1.884	1.972		2.147	2.157	2.275	2.362		2.408	2.307					1.598
20155	1.63	1.76	1.819		1.833	1.887		2.14	2.183	2.261					2.355				1.641
20156	1.651				1.868						2.374			2.397	2.338				1.619
20201	0.947	1.149	1.321	1.659	1.814			2.33	2.356		1.003		1.223												1.773
20202	0.947	1.143	1.331	1.65	1.801	2.053		2.315	2.341		1.016		1.234		1.345						1.719				1.758	1.771	1.81			1.868
20203	0.957	1.099	1.334	1.659	1.822	2.051		2.336	2.339		0.987				1.36				1.705		1.757			1.791	1.74		1.808
20204	0.958	1.144	1.303	1.668	1.819	2.047			2.335		1.015		1.219			1.438			1.718						1.764	1.783				1.863
20205	0.952	1.121	1.328	1.683	1.853	2.057		2.321	2.342		1.015					1.431					1.738			1.785			1.832			1.841
20206						2.053		2.309					1.242		1.354	1.426			1.677		1.713			1.793	1.748	1.78	1.841			1.879
20235									1.774	2.003	1.546	1.754	1.977						3.401
20402	1.032		1.051		1.578	1.321				2.048	1.189		1.182				1.296
20405	1.036		1.03	1.225	1.262	1.381				2.061	1.204				1.13		1.289
21331			0.849		0.835		0.851			0.951		1.124			1.189	2.281	2.156
21332		0.818	0.859		0.841		0.834			0.922		1.115			1.144	2.377	2.035
24012	0.813			0.876	0.902	0.955	0.887		0.897	0.963				0.92		1.09				1.116		1.493		1.445		1.736	2.165
24014	0.81		0.871	0.861	0.908	0.988	0.898		0.887	0.957				0.947								1.299		1.527		2.062	1.861
26475			0.95	0.906	0.946	0.871			0.953		1.244					1.91			2.195
26476	0.896		0.944	0.929	0.95					1.129				1.642					2.342
28251		1.618	1.654	1.603	1.595	1.687					1.896								4.197			4.239
28252		1.6	1.653	1.616	1.571	1.686					1.91			2.045					4.087					1.583
28253		1.62	1.636	1.631	1.68	1.701									2.549							4.07		1.58
28254		1.621	1.678	1.599	1.677	1.693								2.038					4.124			4.204
28255		1.601	1.658			1.684					1.909				2.676				4.151					1.601
28257		1.603									1.861			2.04	2.83				4.178			4.036		1.588
30016		2.408	2.546	2.349			2.538		2.623				2.833		2.988		3.042		2.956
30031	1.674	1.699				0.859				0.825	1.042	1.172	1.075			1.357											2.682
30032	1.677	1.689				0.859	0.74			0.939	1.03	1.144	1.035		1.067	1.318			1.406				1.606				2.613	2.406
30034	1.698	1.692	1.626			0.88	0.757			0.85	1.023	1.14	1.085		1.047	1.362			1.414			1.585					2.647	2.442
30035	1.683	1.7		1.787		0.864				0.926	0.97	1.188	1.067		1.022				1.423			1.578					2.638
30036			1.609	1.776			0.762								1.089	1.285							1.586					2.494
30037			1.611	1.783			0.751								1.042				1.416				1.524				2.671	2.451
30066				3.189												0.943			1.084		1.296		1.385						1.739
30081		1.677	1.67		1.739	1.792		1.79			1.969			2.242
30484		1.62	1.674			1.677				2.124			2.85		3.561	3.934
30485		1.634	1.669		1.692	1.673				2.018			2.884		3.536
30486		1.679	1.66		1.685	1.662				1.883			2.878		3.546
30833		1.464		1.473		1.381	1.717				1.571		1.652			1.788							2.012					2.392
30834		1.456		1.46		1.391	1.731			1.612	1.557		1.649			1.795							2.048
30835		1.469		1.45		1.402				1.634	1.541		1.626	1.658									2.011					2.23
30851				1.766			2.137			2.065	2.18		2.261	1.993		2.583
30853				1.74			2.127			2.009	2.122		2.243	2.204									2.848					3.642
30871		1.003		1.252							1.235		1.41		1.734		1.958		2.793			2.739		2.784
30873		0.998		1.278							1.249		1.399				1.952							2.76
30874		1.007		1.277			2.022				1.222		1.396		1.734				2.674			2.63		2.782				0.605
30875		0.993		1.248		1.322	2.005				1.26				1.68				2.657			2.72		2.652
30876		1.016				1.35	2.016						1.398		1.726		1.943		2.69					2.751				0.598
30879						1.336	2.002										1.921		2.759			2.744						0.62
36891		1.422	1.695		1.871		2.153			2.509	2.269
36895		1.406	1.682				2.204			2.498	2.29
38013	1.893	2.251	1.946	1.93		2.009				1.993	2.034	2.053	1.994		1.936		2.175		1.987									0.83
38015	1.908	2.197	1.927	1.907		2.013				1.963	2.027	2.047	1.968		1.979		2.148			2.148		2.122	1.953			0.834		0.828
41221		2.07			2.051	2.157			2.002			2.082			2.51
41614		1.273	1.446		1.616		1.55		2.039
41615		1.267	1.403		1.648		1.553		2.057
41651		2.035	2.079		2.008	2.033	1.993		1.917					2.15	2.575
41652		2.007	2.069		2.01	2.037	1.968		2.116		2.067			2.113	2.514
41653		1.997	2.104		2.001	2.072	1.988		1.948		2.097			2.121	2.542		2.793
41654		2.014	2.066		1.983	2.088	1.984		2.13		2.105			2.158	2.351		2.779
41655		2.012	2.072		2.026	2.043	1.992		1.938		2.097				2.501		2.768
50077		2.435			1.083								1.226	1.204	1.315
51513		2.369	1.032			1.192	1.543			2.583	3.002	3.241	0.797			0.799										1.254
54031		1.034	1.036		1.111				1.283	1.594	1.822	1.908	1.944	2.008		2.325
54032		1.014	1.024	1.019	1.17				1.387	1.665	1.876	1.883	1.936	1.951		2.335
54033		1.042	1.024			1.103			1.362	1.589	1.809	1.964	1.935	1.995		2.287
54034		1.042	1.016	1.041		1.103			1.336	1.708	1.771	1.87	1.926	1.978		2.28
54035		1.049	1.03	1.029	1.15				1.33	1.538	1.886	1.888	1.932	2.053		2.284
58031				1.643		1.553	2.005			1.773			2.361		2.158
58032				1.647		1.551	2.004			1.81			2.345		2.92		2.791
58034		1.585		1.608		1.522	2.002			1.714			2.322				2.681
58431		1.165	1.253	1.478		1.36	1.397			1.649	1.973	2.191	1.963	1.868
60131		1.852	1.906		2.229				2.599	2.82						2.819
60132		1.787			2.124				2.614	2.788	3.006					2.81
60133		1.807	1.9	2.348	2.243		2.309		2.604	2.86	2.997
60134		1.783	1.911	2.318	2.102		2.303		2.603	2.793						2.85
60135		1.806	1.924	2.316	2.242		2.305		2.611	2.743
77811		2.224	1.124	1.181	1.291		1.596		2.28	2.394	2.43
82021		1.954	1.824	2.046			2.256			2.321	2.58		2.547
82022		2.016	1.851	2.083	2.06		2.244		2.448		2.624		2.55
82023		2.005	1.824		2.07				2.441	2.344			2.481
82024		1.996	1.909	2.092					2.383	2.455	2.572		2.564	2.386		2.784			3.007
82025		1.993		2.053	2.103		2.27		2.413	2.487	2.762					2.804			3.089
82026			1.84	2	2.068		2.256		2.377	2.172				2.511		2.721			3.151
82027					2.137		2.261				2.626		2.524	2.473		2.88			3.152
A3201		1.08	0.882	2.433	1.308	1.002	0.987	1.489	1.004	2.816	3.321					1.174
A3202		0.97	0.887	2.435	0.879	1.001	1.629	1.472	0.896	1.008	3.378				1.264
A3204		0.973	1.047	1.633	1.322	0.95	2.148	1.478	1.78	2.911	3.366				1.05	1.18
A3208			0.877	0.992	0.979				0.979		3.557
A3301		1.439	1.075	1.688	1.601	1.724	1.185	1.96	1.074	1.222	3.547
A3303		1.166	1.066	1.675	0.969	1.725	1.605	1.949	1.199	2.417	4.15
A3306		0.932	1.222	1.109	1.056	1.639	1.198		1.18	2.332	3.949
A3307		0.955	1.349	1.181	1.056			1.967	1.193		4.331
A3308			1.36	1.079	1.054	1.714	2.291		1.196
A3309			1.116	1.197	1.05		2.294		1.189		4.315
A3403		0.88	1.483	1.969	1.718	3.002	3.207	2.043	1.102	1.095
A3501		1.657	1.18	2.101	1.299	1.378	2.304	2.197	1.448	1.964	1.595					0.786
A3505		1.108	0.758	1.271	0.762	1.297	2.275		1.43	2.215					0.819	0.791
A5051			1.551		1.305	1.426			1.491					1.378	1.516	1.544	1.641			1.879								2.291
A5052			1.544	1.368	1.328	1.471										1.552	1.625		1.716				1.962					2.343
A5053			1.543	1.37	1.308	1.432			1.448						1.543	1.552	1.671		1.763						1.937			2.266
A5054				1.356	1.313	1.55			1.485			1.463	1.522		1.57		1.657			1.825			1.918		1.948			2.381
A5056			1.535	1.363					1.517			1.49	1.536	1.389									1.915					2.265
A6062								2.425	1.021		1.017			0.99	0.98	1.007	0.998	1.034	1.104	1.156
A6063								2.376	1.011						0.995	0.982	1.019	1.057		1.436
A6065								2.403	1.02					0.995	0.984	1.002			1.099	1.092			1.22
A6082								2.001	0.91					0.881	0.88	0.925	0.934	0.944	0.902	0.98			1.094
A9011									0.935	1.027	1.087		1.109	1.145					1.371							0.57
A9012						0.659			0.925	1.034		1.119	1.105	1.15					1.388			1.589				0.572
A9022									0.861	0.86		1.026	0.919	1.037					1.143			1.262				0.75
A9023						0.666			0.855	0.856	1.002	1.016	0.917	1.026		1.062			1.102			1.296				0.78
A9024						0.656			0.856	0.855	0.987	1.021	0.931	1.049												0.765
A9034						0.805			1.091	1.134	1.29	1.351	1.297	1.325		1.524			2.084				0.974			0.823
A9035						0.818			1.078	1.115	1.291	1.356	1.301	1.397					2.113							0.821
A9071						0.731			0.987	1.037	1.193		1.168										1.971			0.938
A9073						0.772			1.002	1.053	1.197	1.249	1.15	1.27		1.275			1.503			1.784				0.96
A9075						0.718			1	1.052	1.206	1.268	1.141	1.279					1.502				1.978			0.951
A9082						0.702			0.892	0.921		1.056	0.974	1.087					1.303				1.643		0.653	0.663
A9083						0.694			0.888	0.905	1.037	1.046	0.99	1.063					1.229				1.659		0.664	0.651
A9084						0.698			0.899	0.895	1.022	1.044	0.961	1.085		1.049			1.247				1.66		0.681	0.692
A9085						0.692			0.91	0.899	1.032	1.059	0.958	1.081		1.091			1.254			1.447	1.701			0.683
A9092						0.562			0.725	0.753		0.926	0.839	0.912					1.166				1.604		0.665	0.739
A9093						0.575			0.732	0.733	0.89	0.916	0.85	0.913					1.191			1.344	1.605		0.742	0.736
A9094						0.575			0.742	0.749	0.882	0.948	0.846	0.914		0.938							1.636			0.756
A9095						0.575			0.741	0.752	0.89	0.931	0.841	0.919		0.95			1.182			1.545	1.624		0.693	0.798
B3201		1.068	1.844	1.12	1.145	1.159	1.363	1.427	1.853	2.165	1.514				1.611
B3202		1.074	1.053	1.915	1.548	1.111	1.583	1.432	1.415	2.186	1.563				1.567
B3203		1.073	1.109	1.085	1.489	1.342	1.455	1.702	1.461	2.202	2.356				1.604
B3204		1.67	1.266	1.144	1.241	1.345	1.514	1.377	2.11	2.183	1.564				1.576
B3205		1.071	1.266	1.109	1.536	1.133	1.555	1.702	1.435	2.221	2.313				1.507
B3301		1.53	1.482	2.422	1.275	1.253	1.649	1.77	1.571	2.002	2.185				2.391
B3302		1.226	1.227	0.919	1.203	1.281	1.222	1.769	1.463	1.982	1.874				2.428
B3303		1.617	1.694	1.647	1.639	1.651	1.317	1.765	2.451	2.084	2.234
B3304		1.499	1.32	1.27	1.262	1.713	1.628	1.758	1.76	1.911	2.187
B3305		0.955	2.339	1.188	1.19	1.08	1.156	1.724	1.703	2.028	1.842				2.45
B3306		1.039	1.496	1.323	1.227	1.074	1.605	1.705	2.442		2.089				2.406
B3307		1.291	1.705		1.244		1.183	1.759	2.573						2.445
B3308		1.079	0.962	2.38		1.078			1.279		2.074
B3309			0.934		0.988	1.073	1.204		2.522		1.867
B3311		1.272	1.185	1.006	1.273		1.241	1.328	1.945	2.274	2.437
B3312		1.165	1.214	1.184	1.261		1.235	1.318	1.945	2.309	2.474
B3313		1.175	1.195	1.189	1.15		1.207	1.311	2.149	2.291	2.462
B3314		1.153	1.2	1.066	1.186	1.177	1.219	1.334	2.09	2.26	2.414
B3315		1.199		1.218	1.174	1.176	1.228	1.322	2.063	2.272	2.45
B3401		1.206	1.645	1.406	1.821	1.949	1.343		1.554	2.569	2.379
B3402		1.765	1.17	1.075	1.141	1.821	2.067		3.003	2.688	2.593				2.557
B3403		1.31	1.275	1.085	1.102		1.979	1.305	3.105	2.338	2.488				2.575
B3404		1.768	1.651	1.113	1.286	1.993	1.982		1.554	2.506	2.808				2.71
B3405		1.153	1.845	1.095	1.328	2.01	1.401	1.319	2.791	2.532	2.552				2.7
B3406		1.766	1.655	1.085	1.111	2.007	2.059	1.284	1.546						2.688
B3501		0.952	0.784	1.04	1.414	1.171	0.781	1.305	1.933	2.134	2.169			2.006	2.087
B3502		0.801	1.291	1.136	1.694	1.298	1.165	1.346	1.825	2.124	2.127			2.064	2.044
B3504		1.304	1.083	1.099	1.676	1.206	1.219	1.318	1.93	2.052	1.288			2.032
B3505		1.657	1.386	0.92	1.678	1.273	1.547	1.289	1.676	2.104	2.083			2.134	2.115
B3506		1.616	1.132	1.375	1.325		1.379		1.663					2.107	2.165
B3507		1.299	0.786		1.288	1.262	1.376				1.301				2.078
B3509			1.179	1.371		1.26	0.769				1.303			2.071
B3511		1.147	1.461	1.366	1.492	1.403	1.427	1.442	2.528	2.449	2.686
B3512		1.484	1.454	1.391	1.426	1.395	1.971	1.462	2.578	2.517	2.652
B3513		1.182	1.425	1.379	1.401	1.422	1.378	1.453	2.37	2.612	2.639
B3514		1.151	1.423	1.368	1.382	1.429	2.016	1.454	2.532	2.589	2.957
B3515		1.218		1.336	1.49	1.43	1.401	1.435	2.468	2.499	2.645
B9013						0.657			0.818	0.864	0.962	0.977	0.967	0.967					1.301			1.804	1.487		0.545
B9023						0.623			0.9	0.89	1.14	1.152	0.967	1.188					1.413			1.451	0.916
B9032									0.915	0.952	1.123	1.143	1.046	1.152		1.187						1.455	1.506		0.636			0.653
B9035						0.679			0.925	0.966	1.15	1.15	1.065	1.152		1.18			1.409			1.418	1.503		0.591
B9072						0.783			0.976	1.048	1.116	1.175	1.148	1.213		1.222						1.438						0.702
B9085						0.779			0.996	1.046	1.152	1.221	1.139	1.203					1.37				1.717		0.708
B9092									0.985	1.014	1.195	1.25	1.189	1.302		1.399			1.82				2.299		0.614
B9094						0.655			0.991	0.996	1.2	1.255	1.158	1.305									2.409		0.63			0.768
B9095						0.641			0.98	0.993	1.205	1.248	1.18	1.298					1.8
B9096						0.659					1.2		1.17			1.451						2.827	2.387					0.757
C3303		2.272	2.438	1.41	3.008	1.253	3.42
C3304		1.145	1.585	1.395	3.087	1.297	3.431
C3305		2.302	1.555	1.393	3.126	1.274	3.416
C3501		1.745	1.62	1.603	2.25		2.473
C3504		1.354	1.629	1.608	2.248	1.409	2.462
C3505		1.757	1.61	1.62	2.248		2.447
